## 15 **Abstract**

16 Viral interferon (IFN) antagonist proteins mediate evasion of IFN-mediated innate immunity  
17 and are often multifunctional, having distinct roles in viral replication processes. Functions of  
18 the Ebola virus (EBOV) IFN antagonist VP24 include nucleocapsid assembly during  
19 cytoplasmic replication and inhibition of IFN-activated signalling by STAT1. For the latter,  
20 VP24 prevents STAT1 nuclear import *via* competitive binding to nuclear import receptors  
21 (karyopherins). Many viral proteins, including proteins from viruses with cytoplasmic  
22 replication cycles, interact with the trafficking machinery to undergo nucleocytoplasmic  
23 transport, with key roles in pathogenesis. Despite established karyopherin interaction, the  
24 nuclear trafficking profile of VP24 has not been investigated. We find that VP24 becomes  
25 strongly nuclear following overexpression of karyopherin or inhibition of nuclear export  
26 pathways. Molecular mapping indicates that cytoplasmic localisation of VP24 depends on a  
27 CRM1-dependent nuclear export sequence at the VP24 C-terminus. Nuclear export is not  
28 required for STAT1 antagonism, consistent with competitive karyopherin binding being the  
29 principal antagonistic mechanism while export mediates return of nuclear VP24 to the  
30 cytoplasm for replication functions. Thus, nuclear export of VP24 might provide novel targets  
31 for antiviral approaches.

32

## 33 **Importance**

34 Ebola virus (EBOV) is the causative agent of ongoing outbreaks of severe haemorrhagic fever  
35 with case-fatality rates between 40 and 60%. Proteins of many viruses with cytoplasmic  
36 replication cycles similar to EBOV interact with the nuclear trafficking machinery, resulting  
37 in active nucleocytoplasmic shuttling important to immune evasion and other intranuclear  
38 functions. However, exploitation of host trafficking machinery for nucleocytoplasmic transport  
39 by EBOV has not been directly examined. We find that the EBOV protein VP24 is actively

40 trafficked between the nucleus and cytoplasm, and identify the specific pathways and  
41 sequences involved. The data indicate that nucleocytoplasmic trafficking is important for the  
42 multifunctional nature of VP24, which has critical roles in immune evasion and viral  
43 replication, identifying a new mechanism in infection by this highly lethal pathogen, and  
44 potential target for antivirals.

45

#### 46 **Key words**

47 Ebola virus, VP24, interferon antagonist, nuclear transport, nuclear export sequence, negative-  
48 strand RNA virus

49

#### 50 **Introduction**

51 *Zaire ebolavirus*, commonly known as Ebola virus (EBOV), is a causative agent of multiple  
52 outbreaks of Ebola severe haemorrhagic fever, including the 2014-2016 West African outbreak  
53 and global health emergency, and the recent ongoing outbreak in the Democratic Republic of  
54 Congo. EBOV and other members of the *Ebolavirus* genus belong to the family *Filoviridae*,  
55 which also includes another human pathogen, Marburg virus (MABV; genus *Marburgvirus*),  
56 and Lloviu virus (LLOV; genus *Cuevavirus*) that was identified in bats in 2011 (1). Filoviruses  
57 belong to the order *Mononegavirales* and so have a non-segmented negative-sense RNA  
58 genome; transcription and replication of the genome is exclusively cytoplasmic (2).

59

60 VP24 is one of the seven genes typically encoded in the filovirus genome (2) and was originally  
61 designated a secondary matrix protein (3). However, accumulating evidence indicates critical  
62 roles in genome packaging and the formation, condensation and intracytoplasmic transport of  
63 nucleocapsids (4-14). Consistent with this, VP24 localises to cytoplasmic inclusion bodies  
64 during infection, which are the sites of replication and nucleocapsid formation (14-16). EBOV

65 VP24 also functions as an interferon (IFN) antagonist to suppress the type I IFN-mediated  
66 innate antiviral immune response. Specifically, VP24 blocks the nuclear accumulation of the  
67 IFN-activated transcription factor STAT1, the key mediator of IFN signalling, by binding  
68 competitively to specific karyopherin nuclear import receptors that are responsible for STAT1  
69 transport (17-20).

70

71 Entry to the nucleus is restricted by the impermeable double-membrane nuclear envelope, such  
72 that all nucleocytoplasmic transport occurs through nuclear pore complexes (NPCs) embedded  
73 in the envelope. Proteins/molecules smaller than c. 40-65 kDa are able to diffuse through the  
74 NPC, but specific directional transport of protein cargoes is mediated by expression of nuclear  
75 localisation and nuclear export sequences (NLSs and NESs) that bind to members of the  
76 karyopherin family (also known as importins or exportins) in the cytoplasm or nucleus.  
77 Karyopherins mediate energy-dependent translocation of cargo through the NPC (reviewed in  
78 (21)); this enables regulable nucleocytoplasmic localisation of proteins, and is absolutely  
79 required for transport of cargoes larger than the diffusion limit. In the cytoplasm, karyopherin  
80 alpha ( $K\alpha$ ) adaptor proteins typically recognise NLSs comprising mono- or bi-partite  
81 sequences enriched in positively-charged residues.  $K\alpha$ s also bind to karyopherin beta ( $K\beta$ ),  
82 which facilitates movement of the cargo/ $K\alpha$ / $K\beta$  complex through the NPC.  $K\beta$ s can  
83 additionally directly bind and facilitate import of cargoes containing certain NLSs. Within the  
84 nucleus, cargoes containing NESs (commonly a motif of hydrophobic residues) bind to  
85 exportins, including the ubiquitously expressed and well-characterised chromosomal  
86 maintenance 1 (CRM1), to be exported to the cytoplasm (21).

87

88 STAT1 does not contain a classical NLS and uses a conformational NLS that is presented on  
89 IFN-activated parallel STAT1 homodimers and STAT1-STAT2 heterodimers to mediate

90 nuclear import, which enables transcriptional activation of IFN-stimulated genes (22). STAT1  
91 dimers bind to members of the NPI-1 K $\alpha$  sub-family (K $\alpha$ 1, 5 and 6) at a specific site distinct  
92 from sites bound by other cellular cargoes containing classical NLSs (18, 23, 24). VP24 binds  
93 competitively to this site, inhibiting nuclear import of STAT1, as well as other cellular cargoes  
94 that use the same site, but not cargoes that bind elsewhere (17, 18, 20, 25). The interaction  
95 between VP24 and K $\alpha$  has been the subject of intense research, revealing a well-defined VP24-  
96 K $\alpha$  interface involving contact *via* three clusters of residues in VP24, with importance to IFN  
97 antagonism (19, 20) and VP24 stability (26).

98

99 Several IFN antagonists use karyopherin binding to inhibit nuclear import of host cargo. Severe  
100 acute respiratory syndrome coronavirus (SARS-CoV) ORF6 protein tethers K $\beta$ 1/K $\alpha$ 2  
101 complexes to the ER/golgi membrane, inhibiting IFN-induced STAT1 nuclear import (27). 4b  
102 protein of Middle East respiratory syndrome coronavirus (MERS-CoV) contains a classical  
103 bipartite NLS that competes with nuclear factor  $\kappa\beta$  (NF- $\kappa\beta$ ) for K $\alpha$ 4 to inhibit NF- $\kappa\beta$ -  
104 dependent expression of pro-inflammatory cytokines (28). While SARS-CoV ORF6 remains  
105 cytoplasmic due to ER/Golgi association (27), the 4b NLS-K $\alpha$ 4 interaction mediates 4b nuclear  
106 import, such that this protein is predominantly nuclear (28). Hijacking of nuclear trafficking  
107 pathways for import/export of proteins is common in viruses with cytoplasmic replication  
108 cycles, including RNA viruses such as MERS-CoV (28), rabies virus (RABV) (29) and  
109 henipaviruses (30, 31), and these processes have been linked to pathogenesis. For example, the  
110 RABV IFN antagonist P1 protein binds to STAT1 and shuttles *via* multiple NLSs and NESs,  
111 but is largely cytoplasmic due to a dominant NES that effects nuclear exclusion of P1-STAT1  
112 complexes. Defective nuclear export of P1 correlates with impaired IFN antagonism and viral  
113 attenuation (32-34). Many proteins of cytoplasmic viruses also form intranuclear  
114 interactions/functions, including isoforms of RABV P protein and the matrix proteins of Nipah

115 and Hendra viruses, enabling cytoplasmic viruses to modulate intranuclear processes (35-37).  
116 However, despite extensive characterisation of the VP24-K $\alpha$  interaction, the nuclear  
117 trafficking profile of VP24 remains unresolved.

118

119 Here, we report that EBOV VP24 can undergo specific trafficking between the nucleus and  
120 cytoplasm, involving a C-terminally located NES that enables CRM1-dependent nuclear  
121 export. By identifying critical residues in the NES, we find that VP24 nuclear export is not  
122 essential for STAT1 antagonist function, consistent with competitive K $\alpha$  binding as the key  
123 mechanism, and so appears to be required due to the multifunctional nature of VP24 that  
124 involves cytoplasmic roles in the replication cycle, distinct from immune evasion.

125

## 126 **Results**

### 127 *EBOV VP24 undergoes nucleocytoplasmic trafficking*

128 EBOV VP24 is largely excluded from the nucleus in infected cells (16, 38) and is cytoplasmic  
129 or diffuse in transfected cells (17, 19, 20, 39), such that VP24 differs from MERS-CoV 4b,  
130 which accumulates within the nucleus (28), but is similar to SARS-CoV ORF6, which is largely  
131 cytoplasmic (27). Since VP24 binds to K $\alpha$ s at a site overlapping the site that mediates active  
132 nuclear import of STAT1 (20), it appears likely that cytoplasmic localisation is due to physical  
133 sequestration (similar to ORF6) or rapid nuclear export following entry to the nucleus. We thus  
134 examined whether VP24/K $\alpha$ 1 complexes can accumulate within the nucleus by expressing  
135 full-length VP24 (residues 1-251) fused to GFP (GFP-VP24) or GFP alone in COS7 cells, with  
136 or without co-expression of FLAG-tagged K $\alpha$ 1 or a FLAG control; cells were then  
137 immunostained for FLAG and imaged by confocal laser scanning microscopy (CLSM) (Figure  
138 1A). Nucleocytoplasmic localisation of the proteins was quantified by calculating the nuclear  
139 to cytoplasmic fluorescence ratio (Fn/c, Figure 1B), as previously (34, 40).

140

141 FLAG-K $\alpha$ 1 localised strongly to the nucleus (as expected (27)), irrespective of VP24  
142 expression, and K $\alpha$ 1 expression had no apparent effect on localisation of GFP alone. GFP-  
143 VP24 could be detected in the nucleus and cytoplasm in cells co-expressing the FLAG control,  
144 but localised predominantly to the cytoplasm (Figure 1A,B), consistent with studies in infected  
145 cells (16, 38) and cells expressing HA- or GFP-tagged VP24 (19, 39). However, K $\alpha$ 1 over-  
146 expression effected strong translocation of GFP-VP24 into the nucleus, resulting in clear  
147 intranuclear co-localisation of GFP-VP24 and FLAG-K $\alpha$ 1. Consistent with previous reports  
148 of K $\alpha$ 1-VP24 interaction (17, 18), FLAG-K $\alpha$ 1 co-precipitated with GFP-VP24 from  
149 HEK293T cells (Figure S1). Thus, GFP-VP24 can localise into the nucleus in complexes with  
150 K $\alpha$ 1, indicating that cytoplasmic localisation, which is required for roles in nucleocapsid  
151 assembly/condensation (4, 5, 7), derives from active nuclear export.

152

153 To assess the role of cellular nuclear export pathways in VP24 localisation, we examined the  
154 effect on VP24 of leptomycin B (LMB), an inhibitor of the exportin CRM1 (32, 40). COS7  
155 cells expressing GFP or full-length GFP-VP24 (Figure 2A) were treated with or without LMB  
156 before imaging live by quantitative CLSM (Figure 2B,C). As expected, GFP (~ 30 kDa), which  
157 can diffuse through the NPC and lacks NLSs or NESs, was diffusely localised between the  
158 cytoplasm and nucleus, with negligible effect of LMB. GFP-VP24<sub>1-251</sub> was predominantly  
159 cytoplasmic at steady state in living cells, consistent with localisation of VP24 in fixed cells  
160 (Figure 1) (19, 39). Following LMB treatment, GFP-VP24<sub>1-251</sub> clearly re-localised from the  
161 cytoplasm to the nucleus (> 4 fold increase in Fn/c), indicating that VP24 undergoes active  
162 export from the nucleus mediated by CRM1.

163

164 CRM1 facilitates nuclear export of a broad range of cellular and viral cargoes (including RABV  
165 P1, Hendra virus matrix protein, Measles virus C protein (31)) that present NESs typically  
166 conforming to a motif of hydrophobic residues (L-X<sub>(2-3)</sub>-L-X<sub>(2-3)</sub>-L-X-L, where L corresponds  
167 to L, V, I, F or M, and X is any amino acid (21)). Manual inspection of the VP24 sequence and  
168 analysis using the online NES prediction server NetNES (41) identified four potential CRM1-  
169 dependent NESs (Figure 2A, Figure S2A). Importantly, the Fn/c for GFP-VP24<sub>1-251</sub> in LMB-  
170 treated cells was higher than that for GFP alone (Figure 2C), indicative of accumulation. Thus,  
171 VP24 localisation appears to be dynamic, involving nuclear entry and rapid nuclear export *via*  
172 CRM1 interaction.

173

#### 174 *EBOV VP24 incorporates a CRM1-dependent NES in the C-terminus*

175 To determine which of the predicted NESs is/are responsible for nuclear export, we generated  
176 constructs to express truncated VP24 proteins comprising N-terminal (VP24<sub>1-88</sub>), central  
177 (VP24<sub>89-172</sub>) and C-terminal (VP24<sub>173-251</sub>) portions fused to GFP; each of these contained one  
178 or more of the potential NESs (Figure 2A). The truncated proteins were designed to be of  
179 similar length and to avoid disruption of key structural elements (e.g. alpha helices and beta  
180 sheets), based on the VP24 crystal structure (20). All proteins were predominantly cytoplasmic  
181 at steady state (Figure 2B). Localisation of the N-terminal fragment was largely unaffected by  
182 LMB treatment, and LMB produced only a small ( $\leq 1.4$  fold) increase for the Fn/c of the central  
183 fragment (Figure 2B,C). In contrast, a consistent and substantial increase ( $> 2$  fold) in the Fn/c  
184 for the C-terminal fragment was observed following LMB treatment. VP24<sub>173-251</sub> also displayed  
185 a consistently reduced Fn/c at steady state compared with the other truncated proteins. Thus, it  
186 appeared that prominent discrete CRM1-dependent NES activity is located in the C-terminal  
187 region of VP24.

188



189 Notably, only full-length VP24 displayed accumulation into the nucleus following LMB  
190 treatment, with all truncated proteins remaining significantly less nuclear than GFP alone. This  
191 suggests that the full protein sequence is required for efficient nuclear accumulation, such that  
192 truncations remove key sequences or otherwise impact conformation to affect important  
193 interactions. The crystal structure of VP24 bound to K $\alpha$ 5 indicates that three regions contact  
194 the K $\alpha$  (CL1 and CL2/3, separated by 40-60 residues, Figure 2A), and the importance of these  
195 in K $\alpha$  binding was confirmed by mutagenesis (20). Thus, efficient K $\alpha$  interaction is likely to  
196 be impacted in the truncated proteins, as each lacks at least one CL sequence. Other sequences  
197 involved in distinct cytoplasmic or nuclear interactions are also likely to contribute, and might  
198 be removed or affected by truncation. Thus, to directly confirm that the indicated NES  
199 sequences(s) have classical NES activity in terms of being able to re-localise NLS-containing  
200 proteins, we generated constructs in which VP24<sub>89-172</sub> and VP24<sub>173-251</sub> are fused to an  
201 exogenous classical K $\alpha$ /K $\beta$ -binding NLS from human cytomegalovirus UL44 protein (42),  
202 used previously to confirm NES activity in RABV P protein (43). We also generated VP24<sub>89-</sub>  
203 <sub>251</sub>, which contains all CL sequences and the indicated NES sequences (Figure 2A).

204

205 CLSM analysis indicated that fusion of the UL44 NLS to GFP (GFP-UL44<sub>NLS</sub>) results in a  
206 modest increase in nuclear accumulation, as expected (Figure 3A,B) (42). Fusion of GFP-  
207 UL44<sub>NLS</sub> to VP24<sub>89-172</sub> or VP24<sub>173-251</sub> significantly reduced nuclear localisation, consistent with  
208 nuclear export and/or cytoplasmic arrest. Similar to GFP-VP24<sub>89-172</sub> alone (Figure 2B,C), LMB  
209 induced only a small increase in Fn/c for GFP-UL44<sub>NLS</sub>-VP24<sub>89-172</sub> (Figure 3A,B), suggestive  
210 of cytoplasmic retention or nuclear export mediated largely *via* an alternative mechanism to  
211 CRM1-dependent export. However, LMB induced substantial nuclear localisation of GFP-  
212 UL44<sub>NLS</sub>-VP24<sub>173-251</sub> (> 4.6 fold increase in Fn/c; Figure 3B) that clearly exceeded nuclear  
213 localisation of GFP-VP24<sub>173-251</sub> (Figure 2C), consistent with a classical CRM1-dependent NES

214 counteracting the activity of the heterologous UL44 NLS. The Fn/c for GFP-VP24<sup>89-251</sup> was  
215 also markedly increased by LMB treatment but did not attain an Fn/c similar to that of full-  
216 length GFP-VP24 (Figure 2C, Figure 3B), indicating that the complete protein sequence is  
217 required for efficient nuclear localisation. Nevertheless, these data clearly indicate that VP24  
218 contains classical CRM1-dependent NES activity and that the principal NES is within VP24<sup>173-</sup>  
219 <sup>251</sup>.

220

221 *The C-terminal CRM1-dependent NES is the principal sequence mediating nuclear export of*  
222 *VP24*

223 To confirm that the C-terminal NES is the major sequence driving CRM1-dependent export of  
224 VP24, we used site-directed mutagenesis to disable the NES motif. Analysis of the VP24 C-  
225 terminal region identified residues 241-251 (comprising the C-terminal 11 residues) as  
226 containing a sequence strongly conforming to a NES (Figure 2A), with L243, F245 and L249  
227 having the highest NetNES scores among hydrophobic residues in the region (Figure S2A). *In*  
228 *silico* substitution of these residues to alanine (termed NES mutant, NM) abolished the  
229 predicted NES (Figure S2B).

230

231 Introduction of the substitutions to full-length VP24 significantly enhanced nuclear  
232 localisation, resulting in an Fn/c equivalent to that for WT VP24 in LMB-treated cells (Figure  
233 4A,B). Furthermore, the mutations entirely ablated effects of LMB. Thus,  
234 L243A/F245A/L249A mutations are sufficient to disable CRM1-dependent nuclear export of  
235 VP24, identifying these residues as critical elements of a novel VP24 NES. Similar analysis  
236 of GFP-UL44<sup>NLS</sup>-VP24<sup>173-251</sup> produced comparable results, with the mutations resulting in a  
237 significant increase in nuclear accumulation in untreated cells, attaining an Fn/c equivalent to  
238 that observed for the WT protein in LMB-treated cells (Figure 4C,D). LMB treatment had only

239 a minor residual effect on the localisation of the mutated GFP-UL44<sup>NLS</sup>-VP24<sup>173-251</sup> compared  
240 with the WT protein, consistent with mutations largely disabling nuclear export activity in the  
241 truncated protein.

242

243 Comparison of the C-terminal 11 residues of VP24 from species of the *Ebolavirus* and  
244 *Cuevavirus* genera indicated that L243/F245/L249 are identical or substituted conservatively  
245 for other hydrophobic amino acids that comprise part of the consensus NES sequence (L, V, I,  
246 F or M; Figure 4E); consistent with this, C-terminal NES activity was predicted for all of the  
247 proteins using NetNES (Figure S2C). In contrast, MABV (genus *Marburgvirus*) has a  
248 glutamine residue at the site corresponding to EBOV L243 (Figure 4E), and this results in a  
249 loss of predicted NES activity (Figure S2C). Thus, it appears that NES activity is important for  
250 species of the genus *Ebolavirus* and *Cuevavirus*, but not *Marburgvirus*. Interestingly, MABV  
251 VP24 is unique among the VP24 proteins of filoviruses in that it is reported not to bind K $\alpha$ s  
252 (26, 44, 45). Thus, MABV VP24 would appear not to have the same requirement for interaction  
253 with nuclear trafficking machinery as the VP24 proteins of the other filoviruses.

254

#### 255 *EBOV VP24 NES activity is not required for IFN/STAT1 antagonist function*

256 The conservation of the NES sequence among ebolaviruses and LLOV indicates important  
257 function. Given the central role for VP24 in antagonising signalling by IFN/STAT1 (17-20),  
258 we assessed the effects thereon of NES mutations using an IFN- $\alpha$ /STAT1/2-dependent  
259 luciferase reporter gene assay, as previously (40, 46) (Figure 5). This indicated that GFP-VP24-  
260 NM potently inhibits IFN- $\alpha$ -induced luciferase expression, to an extent similar to that observed  
261 for WT VP24.

262

263 To further examine effects of altered VP24 nuclear trafficking on STAT1 responses, we  
264 assessed nuclear import of STAT1 using CLSM analysis of COS7 cells expressing GFP-VP24  
265 and immunostained for STAT1 following treatment without or with IFN- $\alpha$  and/or LMB. In  
266 agreement with results of the luciferase reporter assays, we observed that despite substantial  
267 re-localisation of GFP-VP24 to the nucleus in LMB-treated cells, IFN- $\alpha$ -dependent STAT1  
268 nuclear localisation remained clearly inhibited (Figure S3). Together, these data indicate that  
269 nuclear export of VP24 is not required for inhibition of STAT1 responses, consistent with K $\alpha$   
270 binding representing the major antagonistic mechanism. Thus, it appears that active  
271 cytoplasmic re-localisation of VP24 principally enables other functions in cytoplasmic viral  
272 replication.

273

## 274 **Discussion**

275 In this study we have shown that EBOV VP24 undergoes active trafficking between the nucleus  
276 and cytoplasm involving CRM1-dependent nuclear export *via* a NES at the VP24 C-terminus.  
277 The acquisition of active nuclear trafficking sequences is consistent with a requirement for  
278 highly regulated/dynamic localisation; furthermore, since VP24 is reported to oligomerise  
279 (potentially as tetramers) (38), it is likely that active nuclear trafficking is required for transport  
280 of VP24 multimers. The identified NES was not resolved in VP24 crystal structures (20, 47,  
281 48) but localisation at the C-terminal end would be consistent with exposure and accessibility  
282 to CRM1 (20), and the predominantly cytoplasmic localisation of GFP-VP24 in resting cells  
283 suggests that the NES is the dominant trafficking signal at steady state. Intriguingly, previous  
284 studies indicated that a mutated VP24 protein defective for K $\alpha$ -binding was more cytoplasmic  
285 than WT protein (49). This would be consistent with karyopherin binding mediating import;  
286 one might thus speculate that VP24 would require export mechanisms to enable cytoplasmic  
287 localisation/functions. Our findings are the first to confirm this is the case. Notably, the EBOV

288 matrix protein VP40 has also been reported to localise to the nucleus in infected and transfected  
289 cells (16, 50); however, a direct role for active trafficking pathways to regulate localisation,  
290 distinct from mechanisms such as diffusion or interaction with other host factors, has not been  
291 defined. Thus, our data provides, to our knowledge, the first direct demonstration of a filovirus  
292 protein exploiting specific host trafficking machinery for nucleocytoplasmic transport,  
293 identifying a new mechanism in infection by these highly lethal pathogens.

294

295 Although the nucleus is not directly involved in the replication processes of most RNA viruses,  
296 proteins of a number of these viruses are reported to encode nuclear trafficking sequences,  
297 indicative of a requirement for dynamic regulation or specific accumulation in particular  
298 compartments. For example, the RABV IFN antagonist P protein encodes several NLSs and  
299 NESs (32, 43, 51-53), with regulatory mechanisms including co-localisation or overlap of the  
300 sequences, enabling co-regulation by mechanisms including phosphorylation (51-53).  
301 Although our data identify the C-terminal NES as a principal determinant of nucleocytoplasmic  
302 localisation of full-length VP24, the differential localisation and LMB sensitivity of VP24<sub>1-88</sub>  
303 and VP24<sub>89-172</sub>, and the finding that VP24<sub>89-251</sub> does not recapitulate nuclear accumulation of  
304 full-length VP24, suggest the presence of alternative regulatory sequences/mechanisms,  
305 potentially exposed by truncation. For example, VP24 is reported to associate with membranes  
306 (38), which might result in tethering within the cytoplasm under certain conditions.  
307 Interestingly, a recent study reported that sumoylation of residue K14 of VP24 enhances K $\alpha$   
308 binding and IFN antagonistic function (54). In contrast, ubiquitination, including at residue  
309 K206 within CL3 (Figure 2A), appears to negatively regulate IFN antagonist activity (54).  
310 Intriguingly, K14 is distal to CL1-3 but is within a predicted NES motif (Figure 2A). Whether  
311 NESs of VP24 undergo dynamic regulation by post-translational modification or other

312 mechanisms will be of interest in defining the processes controlling immune evasion and  
313 replication by EBOV.

314

315 While some viral IFN antagonists use NESs to facilitate immune evasion, including through  
316 mislocalisation of associated STATs (33, 34), VP24 uses a mechanism of competitive binding  
317 to  $K\alpha$ s. Our finding that VP24 nuclear export is not required for STAT antagonism is consistent  
318 with this, and indicates that export relates to cytoplasmic roles including in nucleocapsid  
319 assembly and transport (4-14). The requirement for efficient translocation out of the nucleus is  
320 consistent with interaction of VP24 with  $K\alpha$  (see above), that underpins distinct functions in  
321 immune evasion. This is further supported by our finding that the C-terminal NES motif is  
322 conserved among VP24 of several filovirus species that have been shown to bind to  $K\alpha$ s or  
323 have conserved CL sequences (20, 26, 45), but not in MABV VP24 (Figure 4E, Figure S2C),  
324 which has no role in antagonising STAT1, and does not bind  $K\alpha$ s (26, 44).

325

326 Other than nucleocapsid formation and transport, cytoplasmic VP24 may also function in  
327 budding (5, 38, 55) as a ‘minor matrix protein’. Similarly to matrix proteins of a number of  
328 other viruses of the order *Mononegavirales*, VP24 is reported to have negative effects on  
329 transcription/genome replication (56, 57), likely due to roles in genome  
330 packaging/nucleocapsid condensation (7, 11, 56, 57). Interestingly, imaging of EBOV-infected  
331 cells indicated that VP24 accumulates within nucleoprotein-rich inclusion bodies only from 18  
332 hours post-infection (16), presumably to permit sufficient transcription/replication before  
333 packaging for assembly and release. Thus, VP24 nucleocytoplasmic trafficking might provide  
334 regulation of the replication-assembly switch, similar to mechanisms proposed for dynamic  
335 nucleocytoplasmic localisation of matrix proteins of paramyxoviruses (31). Many matrix  
336 proteins of henipaviruses have also recently been shown to have specific intranuclear functions

337 through interaction with nuclear/nucleolar proteins (36, 37). In light of our finding that VP24  
338 undergoes nucleocytoplasmic trafficking, it is intriguing that mass spectrometry analysis  
339 identified a large number of proteins in the VP24 interactome with functions related to the  
340 nucleus (39), consistent with possible intranuclear functions of VP24. Given the nuclear  
341 localisation of EBOV VP40 early in infection (16), it appears that the nucleus might represent  
342 an important hub for EBOV-host interactions.

343

344 The multiple roles of EBOV VP24 are likely to account for the lack of success in generating a  
345 VP24-deficient virus (5); however, roles in virulence are indicated by the finding that mutations  
346 acquired in the VP24 gene during serial passaging in guinea pigs were necessary and sufficient  
347 to confer lethality (58). Notably, the adaptations were not associated with IFN antagonism (58),  
348 implying distinct roles in pathogenesis. Moreover, a phosphorodiamidate morpholino oligomer  
349 that targets VP24 mRNA protects rhesus monkeys against lethal EBOV infection (59, 60).  
350 Inhibition of CRM1-mediated nuclear export is reported to have antiviral effects against  
351 diverse viruses, including the RNA viruses Dengue virus and respiratory syncytial virus (61),  
352 while mutations impacting the RABV P protein NES correlate with attenuation *in vivo* (34).  
353 Thus, targeting VP24 regulatory mechanisms, including its nuclear export, may provide novel  
354 targets for anti-EBOV drug design.

355

## 356 **Materials and Methods**

### 357 *Constructs, cells, transfections and drug treatments*

358 The construct to express the minimal NLS from human cytomegalovirus UL44 protein  
359 (residues 425-433) fused to GFP was generated by subcloning from pEPI-GFP-UL44<sub>425-433</sub> (42,  
360 43) into the pEGFP-C1 vector C-terminal to GFP (Clontech). Constructs to express full-length  
361 or truncated EBOV-VP24 protein fused to GFP or GFP-UL44<sub>NLS</sub> were generated by PCR

362 amplification from pCAGGS-FLAG-VP24 (kindly provided by C. Basler, Georgia State  
363 University), and cloning into the pEGFP-C1 or pEGFP-C1-UL44<sup>NLS</sup> vectors C-terminal to  
364 GFP/GFP-UL44<sup>NLS</sup>. NES mutations (L243A/F245A/L249A) were introduced into VP24  
365 sequences by site-directed PCR mutagenesis, and cloning into vectors, as above. The construct  
366 to express FLAG-tagged K $\alpha$ 1 was a kind gift from C. Basler (Georgia State University). Other  
367 constructs have been described elsewhere (40).

368

369 COS7 and HEK293T cells were maintained in DMEM supplemented with 10 % FCS and  
370 GlutaMAX (Life Technologies), 5 % CO<sub>2</sub>, 37°C. Transfections used Lipofectamine 2000 and  
371 Lipofectamine 3000 (Invitrogen), according to the manufacturer's instructions. To inhibit  
372 CRM1-dependent nuclear export pathway, cells were treated with 2.8 ng/ml LMB (Cell  
373 Signaling Technology and a gift from M. Yoshida, RIKEN, Japan) for 3 h. To activate STAT1  
374 nuclear localisation, cells incubated in serum-free DMEM (with or without 2.8 ng/ml LMB, 3  
375 h) were treated with IFN- $\alpha$  (Universal Type I IFN, PBL Assay Science; 1000 U/ml, 30 min).

376

### 377 *Confocal Laser Scanning Microscopy (CLSM)*

378 For analysis of VP24 localisation (with or without K $\alpha$ 1 over-expression) or STAT1  
379 localisation, cells growing on coverslips and treated with or without LMB and IFN- $\alpha$  were  
380 fixed using 3.7 % formaldehyde (10 min, room temperature (RT)) followed by 90 % methanol  
381 (5 min, RT) before immunostaining. Antibodies used were: anti-FLAG (Sigma-Aldrich,  
382 F1804), anti-STAT1 (Cell Signaling Technology, 14994), anti-mouse Alexa Fluor 568  
383 (ThermoFisher Scientific, A11004), anti-rabbit Alexa Fluor 647 (ThermoFisher Scientific,  
384 A21244). For live cell imaging, cells growing on coverslips were analysed under phenol-free  
385 DMEM. Imaging used a Nikon C1 inverted confocal microscope with 63 X objective and  
386 heated chamber for live cells. Digitised confocal images were processed using Fiji software



387 (NIH). To quantify nucleocytoplasmic localisation, the ratio of nuclear to cytoplasmic  
388 fluorescence, corrected for background fluorescence (Fn/c), was calculated for individual cells  
389 expressing transfected protein (40); the mean Fn/c was calculated for  $n \geq 31$  cells for each  
390 condition in each assay.

391

### 392 *Co-immunoprecipitation*

393 Cells were transfected with plasmids and lysed for immunoprecipitation using GFP-Trap beads  
394 (Chromotek), according to the manufacturer's instructions. Lysis and wash buffers were  
395 supplemented with cComplete Protease Inhibitor Cocktail (Roche). Lysates and  
396 immunoprecipitates were analysed by SDS-PAGE and immunoblotting using antibodies  
397 against FLAG (Sigma-Aldrich, F1804), GFP (Roche Applied Science, 11814460001) and  
398 HRP-conjugated secondary antibodies (Merck). Visualisation of bands used Western  
399 Lightning chemiluminescence reagents (PerkinElmer).

400

### 401 *Luciferase Reporter Gene Assays*

402 Cells were co-transfected with pISRE-Luc (in which Firefly luciferase expression is under the  
403 control of a STAT1/2-dependent *IFN-sensitive response element*-containing promoter) and  
404 pRL-TK (transfection control, from which *Renilla* luciferase is constitutively expressed), as  
405 previously described (46), together with protein expression constructs. Cells were treated 8 h  
406 post-transfection with or without IFN- $\alpha$  (1000 U/ml) before lysis 16 h later using Passive Lysis  
407 Buffer (Promega). Firefly and *Renilla* luciferase activity was then determined in a dual  
408 luciferase assay, as previously described (46). GFP-RABV N-protein, which does not affect  
409 STAT signalling, was used as a negative control, as previously (40). The ratio of Firefly to  
410 *Renilla* luciferase activity was determined for each condition, and then calculated relative to  
411 that for GFP-N-expressing cells treated with IFN- $\alpha$  (relative luciferase activity). Data from 4

412 independent assays were combined, where each assay result is the mean of three biological  
413 replicate samples.

414

#### 415 *Statistical Analysis*

416 Unpaired two-tailed Student's *t*-test was performed using Prism software (version 7,  
417 GraphPad).

418

#### 419 *Sequence analysis*

420 VP24 protein sequences from *Zaire ebolavirus* (NCBI accession no. AGB56798.1), *Tai Forest*  
421 *ebolavirus* (YP\_003815430.1), *Bundibugyo ebolavirus* (YP\_003815439.1), *Sudan ebolavirus*  
422 (YP\_138526.1), *Reston ebolavirus* (NP\_690586.1), *Lloviu cuevavirus* (YP\_004928142.1) and  
423 *Marburg marburgvirus* (ABE27080.1) were aligned using the COBALT constraint-based  
424 multiple alignment tool (NIH, NCBI). To identify potential NES sequences, VP24 protein  
425 sequences were analysed using the NetNES 1.1 server  
426 <http://www.cbs.dtu.dk/services/NetNES/> (41).

427

#### 428 **Data Availability**

429 Data available upon request to Gregory W Moseley: [greg.moseley@monash.edu](mailto:greg.moseley@monash.edu)

430

#### 431 **Acknowledgements**

432 This research was supported by National Health and Medical Research Council Australia  
433 project grants 1160838, 1125704 and 1079211 (G.W.M), Australian Research Council  
434 discovery project grant DP150102569 (G.W.M) and Australian Government Research  
435 Training Program Scholarship (A.R.H). We acknowledge Cassandra David for assistance with  
436 tissue culture, and the facilities and technical assistance of the Monash Micro Imaging Facility

437 (Monash University). Plasmids to express FLAG-VP24 and FLAG-K $\alpha$ 1 were kind gifts from  
438 C. Basler (Georgia State University). LMB was a gift from M. Yoshida (RIKEN, Japan).

439

#### 440 **Conflict of Interest**

441 The authors declare that they have no conflicts of interest with the contents of this article.

442

#### 443 **References**

- 444 1. Negredo A, Palacios G, Vázquez-Morón S, González F, Dopazo H, Molero F, Juste J,  
445 Quetglas J, Savji N, de la Cruz Martínez M, Herrera JE, Pizarro M, Hutchison SK,  
446 Echevarría JE, Lipkin WI, Tenorio A. 2011. Discovery of an Ebolavirus-Like Filovirus  
447 in Europe. *PLoS Pathogens* 7:e1002304.
- 448 2. Emanuel J, Marzi A, Feldmann H. 2018. Filoviruses: Ecology, Molecular Biology, and  
449 Evolution. *Adv Virus Res* 100:189-221.
- 450 3. Elliott L, Kiley M, McCormick J. 1985. Descriptive Analysis of Ebola Virus Proteins.  
451 *Virology* 147:169-176.
- 452 4. Hoenen T, Groseth A, Kolesnikova L, Theriault S, Ebihara H, Hartlieb B, Bamberg S,  
453 Feldmann H, Stroher U, Becker S. 2006. Infection of naive target cells with virus-like  
454 particles: implications for the function of ebola virus VP24. *J Virol* 80:7260-4.
- 455 5. Mateo M, Carbonnelle C, Martinez MJ, Reynard O, Page A, Volchkova VA, Volchkov  
456 VE. 2011. Knockdown of Ebola virus VP24 impairs viral nucleocapsid assembly and  
457 prevents virus replication. *J Infect Dis* 204 Suppl 3:S892-6.
- 458 6. Huang Y, Xu L, Sun Y, Nabel GJ. 2002. The assembly of Ebola virus nucleocapsid  
459 requires virion-associated proteins 35 and 24 and posttranslational modification of  
460 nucleoprotein. *Mol Cell* 10:307-316.

- 461 7. Banadyga L, Hoenen T, Ambroggio X, Dunham E, Groseth A, Ebihara H. 2017. Ebola  
462 virus VP24 interacts with NP to facilitate nucleocapsid assembly and genome  
463 packaging. *Sci Rep* 7:7698.
- 464 8. Watanabe S, Noda T, Kawaoka Y. 2006. Functional mapping of the nucleoprotein of  
465 Ebola virus. *J Virol* 80:3743-51.
- 466 9. Wan W, Kolesnikova L, Clarke M, Koehler A, Noda T, Becker S, Briggs JAG. 2017.  
467 Structure and assembly of the Ebola virus nucleocapsid. *Nature* 551:394-397.
- 468 10. Bharat TA, Noda T, Riches JD, Kraehling V, Kolesnikova L, Becker S, Kawaoka Y,  
469 Briggs JA. 2012. Structural dissection of Ebola virus and its assembly determinants  
470 using cryo-electron tomography. *Proc Natl Acad Sci U S A* 109:4275-80.
- 471 11. Watt A, Moukambi F, Banadyga L, Groseth A, Callison J, Herwig A, Ebihara H,  
472 Feldmann H, Hoenen T. 2014. A novel life cycle modeling system for Ebola virus  
473 shows a genome length-dependent role of VP24 in virus infectivity. *J Virol* 88:10511-  
474 24.
- 475 12. Noda T, Halfmann P, Sagara H, Kawaoka Y. 2007. Regions in Ebola Virus VP24 That  
476 Are Important for Nucleocapsid Formation. *J Infect Dis* 196:S247-S250.
- 477 13. Beniac DR, Melito PL, Devarenes SL, Hiebert SL, Rabb MJ, Lamboo LL, Jones SM,  
478 Booth TF. 2012. The organisation of Ebola virus reveals a capacity for extensive,  
479 modular polyploidy. *PLoS One* 7:e29608.
- 480 14. Takamatsu Y, Kolesnikova L, Becker S. 2018. Ebola virus proteins NP, VP35, and  
481 VP24 are essential and sufficient to mediate nucleocapsid transport. *Proc Natl Acad Sci*  
482 *U S A* 115:1075-1080.
- 483 15. Hoenen T, Shabman RS, Groseth A, Herwig A, Weber M, Schudt G, Dolnik O, Basler  
484 CF, Becker S, Feldmann H. 2012. Inclusion bodies are a site of ebolavirus replication.  
485 *J Virol* 86:11779-88.

- 486 16. Nanbo A, Watanabe S, Halfmann P, Kawaoka Y. 2013. The spatio-temporal  
487 distribution dynamics of Ebola virus proteins and RNA in infected cells. *Sci Rep*  
488 3:1206.
- 489 17. Reid SP, Leung LW, Hartman AL, Martinez O, Shaw ML, Carbonnelle C, Volchkov  
490 VE, Nichol ST, Basler CF. 2006. Ebola virus VP24 binds karyopherin alpha1 and  
491 blocks STAT1 nuclear accumulation. *J Virol* 80:5156-67.
- 492 18. Reid SP, Valmas C, Martinez O, Sanchez FM, Basler CF. 2007. Ebola virus VP24  
493 proteins inhibit the interaction of NPI-1 subfamily karyopherin alpha proteins with  
494 activated STAT1. *J Virol* 81:13469-77.
- 495 19. Mateo M, Reid SP, Leung LW, Basler CF, Volchkov VE. 2010. Ebolavirus VP24  
496 binding to karyopherins is required for inhibition of interferon signaling. *J Virol*  
497 84:1169-75.
- 498 20. Xu W, Edwards MR, Borek DM, Feagins AR, Mittal A, Alinger JB, Berry KN, Yen B,  
499 Hamilton J, Brett TJ, Pappu RV, Leung DW, Basler CF, Amarasinghe GK. 2014. Ebola  
500 virus VP24 targets a unique NLS binding site on karyopherin alpha 5 to selectively  
501 compete with nuclear import of phosphorylated STAT1. *Cell Host Microbe* 16:187-  
502 200.
- 503 21. Cautain B, Hill R, de Pedro N, Link W. 2015. Components and regulation of nuclear  
504 transport processes. *FEBS J* 282:445-62.
- 505 22. Melen K, Kinnunen L, Julkunen I. 2001. Arginine/lysine-rich structural element is  
506 involved in interferon-induced nuclear import of STATs. *J Biol Chem* 276:16447-55.
- 507 23. Sekimoto T, Imamoto N, Nakajima K, Hirano T, Yoneda Y. 1997. Extracellular signal-  
508 dependent nuclear import of Stat1 is mediated by nuclear pore-targeting complex  
509 formation with NPI-1, but not Rch1. *The EMBO Journal* 16:7067-7077.

- 510 24. Melen K, Fagerlund R, Franke J, Kohler M, Kinnunen L, Julkunen I. 2003. Importin  
511 alpha nuclear localization signal binding sites for STAT1, STAT2, and influenza A  
512 virus nucleoprotein. *J Biol Chem* 278:28193-200.
- 513 25. Shabman RS, Gulcicek EE, Stone KL, Basler CF. 2011. The Ebola virus VP24 protein  
514 prevents hnRNP C1/C2 binding to karyopherin alpha1 and partially alters its nuclear  
515 import. *J Infect Dis* 204 Suppl 3:S904-10.
- 516 26. Schwarz TM, Edwards MR, Diederichs A, Alinger JB, Leung DW, Amarasinghe GK,  
517 Basler CF. 2017. VP24-Karyopherin Alpha Binding Affinities Differ between  
518 Ebolavirus Species, Influencing Interferon Inhibition and VP24 Stability. *J Virol*  
519 91:e01715-16.
- 520 27. Frieman M, Yount B, Heise M, Kopecky-Bromberg SA, Palese P, Baric RS. 2007.  
521 Severe acute respiratory syndrome coronavirus ORF6 antagonizes STAT1 function by  
522 sequestering nuclear import factors on the rough endoplasmic reticulum/Golgi  
523 membrane. *J Virol* 81:9812-24.
- 524 28. Canton J, Fehr AR, Fernandez-Delgado R, Gutierrez-Alvarez FJ, Sanchez-Aparicio  
525 MT, Garcia-Sastre A, Perlman S, Enjuanes L, Sola I. 2018. MERS-CoV 4b protein  
526 interferes with the NF-kappaB-dependent innate immune response during infection.  
527 *PLoS Pathog* 14:e1006838.
- 528 29. Oksayan S, Ito N, Moseley G, Blondel D. 2012. Subcellular trafficking in rhabdovirus  
529 infection and immune evasion: a novel target for therapeutics. *Infect Disord Drug*  
530 *Targets* 12:38-58.
- 531 30. Rawlinson SM, Moseley GW. 2015. The nucleolar interface of RNA viruses. *Cell*  
532 *Microbiol* 17:1108-20.

- 533 31. Audsley MD, Jans DA, Moseley GW. 2016. Roles of nuclear trafficking in infection  
534 by cytoplasmic negative-strand RNA viruses: paramyxoviruses and beyond. *J Gen*  
535 *Virol* 97:2463-2481.
- 536 32. Padeloup D, Poisson N, Raux H, Gaudin Y, Ruigrok RW, Blondel D. 2005.  
537 Nucleocytoplasmic shuttling of the rabies virus P protein requires a nuclear localization  
538 signal and a CRM1-dependent nuclear export signal. *Virology* 334:284-93.
- 539 33. Vidy A, El Bougrini J, Chelbi-Alix MK, Blondel D. 2007. The nucleocytoplasmic  
540 rabies virus P protein counteracts interferon signaling by inhibiting both nuclear  
541 accumulation and DNA binding of STAT1. *J Virol* 81:4255-63.
- 542 34. Ito N, Moseley GW, Blondel D, Shimizu K, Rowe CL, Ito Y, Masatani T, Nakagawa  
543 K, Jans DA, Sugiyama M. 2010. Role of interferon antagonist activity of rabies virus  
544 phosphoprotein in viral pathogenicity. *J Virol* 84:6699-710.
- 545 35. Blondel D, Regad T, Poisson N, Pavie B, Harper F, Pandolfi PP, De The H, Chelbi-  
546 Alix MK. 2002. Rabies virus P and small P products interact directly with PML and  
547 reorganize PML nuclear bodies. *Oncogene* 21:7957-70.
- 548 36. Rawlinson SM, Zhao T, Rozario AM, Rootes CL, McMillan PJ, Purcell AW, Woon A,  
549 Marsh GA, Lieu KG, Wang LF, Netter HJ, Bell TDM, Stewart CR, Moseley GW. 2018.  
550 Viral regulation of host cell biology by hijacking of the nucleolar DNA-damage  
551 response. *Nat Commun* 9:3057.
- 552 37. Pentecost M, Vashisht AA, Lester T, Voros T, Beaty SM, Park A, Wang YE, Yun TE,  
553 Freiberg AN, Wohlschlegel JA, Lee B. 2015. Evidence for ubiquitin-regulated nuclear  
554 and subnuclear trafficking among Paramyxovirinae matrix proteins. *PLoS Pathog*  
555 11:e1004739.

- 556 38. Han Z, Boshra H, Sunyer JO, Zwiers SH, Paragas J, Harty RN. 2003. Biochemical and  
557 Functional Characterization of the Ebola Virus VP24 Protein: Implications for a Role  
558 in Virus Assembly and Budding. *Journal of Virology* 77:1793-1800.
- 559 39. Garcia-Dorival I, Wu W, Dowall S, Armstrong S, Touzelet O, Wastling J, Barr JN,  
560 Matthews D, Carroll M, Hewson R, Hiscox JA. 2014. Elucidation of the Ebola virus  
561 VP24 cellular interactome and disruption of virus biology through targeted inhibition  
562 of host-cell protein function. *J Proteome Res* 13:5120-35.
- 563 40. Wiltzer L, Larrous F, Oksayan S, Ito N, Marsh GA, Wang LF, Blondel D, Bourhy H,  
564 Jans DA, Moseley GW. 2012. Conservation of a unique mechanism of immune evasion  
565 across the Lyssavirus genus. *J Virol* 86:10194-9.
- 566 41. la Cour T, Kiemer L, Molgaard A, Gupta R, Skriver K, Brunak S. 2004. Analysis and  
567 prediction of leucine-rich nuclear export signals. *Protein Eng Des Sel* 17:527-36.
- 568 42. Alvisi G, Jans DA, Guo J, Pinna LA, Ripalti A. 2005. A protein kinase CK2 site  
569 flanking the nuclear targeting signal enhances nuclear transport of human  
570 cytomegalovirus ppUL44. *Traffic* 6:1002-13.
- 571 43. Moseley G, Roth DM, DeJesus MA, Leyton DL, Filmer RP, Pouton CW, Jans DA.  
572 2007. Dynein light chain association sequences can facilitate nuclear protein import.  
573 *Mol Bio Cell* 8:3204-3213.
- 574 44. Valmas C, Grosch MN, Schumann M, Olejnik J, Martinez O, Best SM, Krahling V,  
575 Basler CF, Muhlberger E. 2010. Marburg virus evades interferon responses by a  
576 mechanism distinct from ebola virus. *PLoS Pathog* 6:e1000721.
- 577 45. Feagins AR, Basler CF. 2015. Lloviu virus VP24 and VP35 proteins function as innate  
578 immune antagonists in human and bat cells. *Virology* 485:145-52.



- 579 46. Wiltzer L, Okada K, Yamaoka S, Larrous F, Kuusisto HV, Sugiyama M, Blondel D,  
580 Bourhy H, Jans DA, Ito N, Moseley GW. 2014. Interaction of Rabies Virus P-Protein  
581 With STAT Proteins is Critical to Lethal Rabies Disease. *J Infect Dis* 209:1744-53.
- 582 47. Zhang AP, Bornholdt ZA, Liu T, Abelson DM, Lee DE, Li S, Woods VL, Jr., Saphire  
583 EO. 2012. The ebola virus interferon antagonist VP24 directly binds STAT1 and has a  
584 novel, pyramidal fold. *PLoS Pathog* 8:e1002550.
- 585 48. Zhang APP, Bornholdt ZA, Abelson DM, Saphire EO. 2014. Crystal Structure of  
586 Marburg Virus VP24. *Journal of Virology* 88:5859-5863.
- 587 49. He F, Melen K, Maljanen S, Lundberg R, Jiang M, Osterlund P, Kakkola L, Julkunen  
588 I. 2017. Ebolavirus protein VP24 interferes with innate immune responses by inhibiting  
589 interferon-lambda1 gene expression. *Virology* 509:23-34.
- 590 50. Del Vecchio K, Frick CT, Gc JB, Oda SI, Gerstman BS, Saphire EO, Chapagain PP,  
591 Stahelin RV. 2018. A cationic, C-terminal patch and structural rearrangements in Ebola  
592 virus matrix VP40 protein control its interactions with phosphatidylserine. *J Biol Chem*  
593 293:3335-3349.
- 594 51. Moseley GW, Filmer RP, DeJesus MA, Jans DA. 2007. Nucleocytoplasmic distribution  
595 of rabies virus P-protein is regulated by phosphorylation adjacent to C-terminal nuclear  
596 import and export signals. *Biochemistry* 46:12053-61.
- 597 52. Oksayan S, Wiltzer L, Rowe CL, Blondel D, Jans DA, Moseley GW. 2012. A novel  
598 nuclear trafficking module regulates the nucleocytoplasmic localization of the rabies  
599 virus interferon antagonist, P protein. *J Biol Chem* 287:28112-21.
- 600 53. Rowe CL, Wagstaff KM, Oksayan S, Glover DJ, Jans DA, Moseley GW. 2016. Nuclear  
601 Trafficking of the Rabies Virus Interferon Antagonist P-Protein Is Regulated by an  
602 Importin-Binding Nuclear Localization Sequence in the C-Terminal Domain. *PLoS*  
603 *One* 11:e0150477.

- 604 54. Vidal S, El Motiam A, Seoane R, Preitakaite V, Bouzaher YH, Gomez-Medina S, San  
605 Martin C, Rodriguez D, Rejas MT, Baz-Martinez M, Barrio R, Sutherland JD,  
606 Rodriguez MS, Munoz-Fontela C, Rivas C. 2019. Regulation of the Ebola Virus VP24  
607 Protein by SUMO. *J Virol* 94:e01687-19.
- 608 55. Licata JM, Johnson RF, Han Z, Harty RN. 2004. Contribution of ebola virus  
609 glycoprotein, nucleoprotein, and VP24 to budding of VP40 virus-like particles. *J Virol*  
610 78:7344-51.
- 611 56. Hoenen T, Jung S, Herwig A, Groseth A, Becker S. 2010. Both matrix proteins of Ebola  
612 virus contribute to the regulation of viral genome replication and transcription.  
613 *Virology* 403:56-66.
- 614 57. Watanabe S, Noda T, Halfmann P, Jasenosky L, Kawaoka Y. 2007. Ebola virus  
615 (EBOV) VP24 inhibits transcription and replication of the EBOV genome. *J Infect Dis*  
616 196 Suppl 2:S284-90.
- 617 58. Mateo M, Carbonnelle C, Reynard O, Kolesnikova L, Nemirov K, Page A, Volchkova  
618 VA, Volchkov V. 2011. VP24 Is a Molecular Determinant of Ebola Virus Virulence  
619 in Guinea Pigs. *J Infect Dis* 204:S1011-S1020.
- 620 59. Warren TK, Whitehouse CA, Wells J, Welch L, Heald AE, Charleston JS, Sazani P,  
621 Reid SP, Iversen PL, Bavari S. 2015. A single phosphorodiamidate morpholino  
622 oligomer targeting VP24 protects rhesus monkeys against lethal Ebola virus infection.  
623 *mBio* 6:e02344-14.
- 624 60. Warren TK, Warfield KL, Wells J, Swenson DL, Donner KS, Van Tongeren SA, Garza  
625 NL, Dong L, Mourich DV, Crumley S, Nichols DK, Iversen PL, Bavari S. 2010.  
626 Advanced antisense therapies for postexposure protection against lethal filovirus  
627 infections. *Nat Med* 16:991-4.

628 61. Mathew C, Ghildyal R. 2017. CRM1 Inhibitors for Antiviral Therapy. *Front Microbiol*  
629 8:1171.  
630  
631

632 **Figure Legends**

633 **Figure 1. K $\alpha$ 1-VP24 complexes can localise to the nucleus.** (A) COS7 cells co-transfected  
634 to express GFP or GFP-VP24 with FLAG (control) or FLAG-K $\alpha$ 1 were fixed 24 h post-  
635 transfection before immunofluorescent staining for FLAG (red) and CLSM analysis.  
636 Representative images are shown. (B) Images such as those shown in A were analysed to  
637 calculate the nuclear to cytoplasmic fluorescence ratio (Fn/c) for GFP (mean  $\pm$  SEM,  $n \geq 52$   
638 cells for each condition; results are from a single assay representative of three independent  
639 assays). Statistical analysis (Student's *t*-test) was performed using GraphPad Prism software.  
640 \*\*\*\*,  $p < 0.0001$ .

641

642 **Figure 2. EBOV VP24 undergoes CRM1-dependent nuclear export.** (A) Schematic of full-  
643 length VP24 and truncated VP24 proteins generated. Location of potential NESs are shown in  
644 yellow. Location of clusters (CL1-3) of residues that interact with K $\alpha$ s in the VP24:K $\alpha$ 5  
645 complex crystal structure (20) are shown in red. Numbering indicates residue positions in full-  
646 length VP24; sequences of potential NESs are shown above. (B) COS7 cells transfected to  
647 express the indicated proteins were treated 24 h post-transfection with or without LMB (2.8  
648 ng/ml, 3 h) before live-cell CLSM analysis. Representative images are shown. (C) Images such  
649 as those shown in B were analysed to calculate the Fn/c for GFP (C; mean  $\pm$  SEM;  $n \geq 31$  cells  
650 for each condition; results are from a single assay representative of three independent assays).  
651 Statistical analysis used Student's *t*-test. \*\*\*\*,  $p < 0.0001$ ; No add., no addition.

652

653 **Figure 3. EBOV VP24 C-terminal region contains discrete CRM1-dependent NES**  
654 **activity.** (A,B) COS7 cells transfected to express the indicated proteins were treated 24 h post-  
655 transfection with or without LMB (2.8 ng/ml, 3 h) before live-cell CLSM analysis (A) and  
656 determination of the Fn/c for GFP (B; mean  $\pm$  SEM;  $n \geq 40$  cells for each condition; results are

657 from a single assay representative of two independent assays). Statistical analysis used  
658 Student's *t*-test. \*\*,  $p < 0.01$ ; \*\*\*\*,  $p < 0.0001$ ; no add., No addition.

659

660 **Figure 4. VP24 residues L243, F245 and L249 are critical for VP24 nuclear export. (A-D)**

661 COS7 cells transfected to express the indicated proteins were treated 24 h post-transfection  
662 with or without LMB (2.8 ng/ml, 3 h) before live-cell CLSM analysis (A,C) and determination  
663 of the Fn/c for GFP (B,D; mean  $\pm$  SEM;  $n \geq 50$  cells for each condition; results are from single  
664 assays representative of three independent assays). Statistical analysis used Student's *t*-test.

665 \*\*\*\*,  $p < 0.0001$ ; NS, not significant; No add., no addition; WT, wildtype; NM, NES mutant.

666 (E) Alignment of the C-terminal 11 residues of VP24. Red and blue font indicate conserved  
667 and non-conserved residues, respectively. EBOV VP24 residues implicated in CRM1-  
668 dependent nuclear export (A-D) are highlighted in yellow. Q245 of MABV VP24, which  
669 results in loss of NES consensus, is highlighted in blue.

670

671 **Figure 5. EBOV VP24 NES activity is not required for inhibition of IFN- $\alpha$ /STAT1/2-**

672 **dependent gene expression.** HEK293T cells co-transfected with pISRE-Luc and pRL-TK  
673 plasmids, and plasmids to express GFP-fused RABV N (control), VP24 WT or VP24 NM,  
674 were treated 8 h post-transfection with or without IFN- $\alpha$  (1,000 U/ml, 16 h) before  
675 determination of relative luciferase activity (mean  $\pm$  SEM;  $n = 4$  independent assays, each of  
676 which was performed in triplicate); *lower panel*: expression of proteins in cell lysates used in

677 a representative assay was analysed by immunoblotting (IB) for GFP. Statistical analysis used

678 Student's *t*-test; \*,  $p < 0.05$ ; \*\*\*\*,  $p < 0.0001$ .

Figure 1

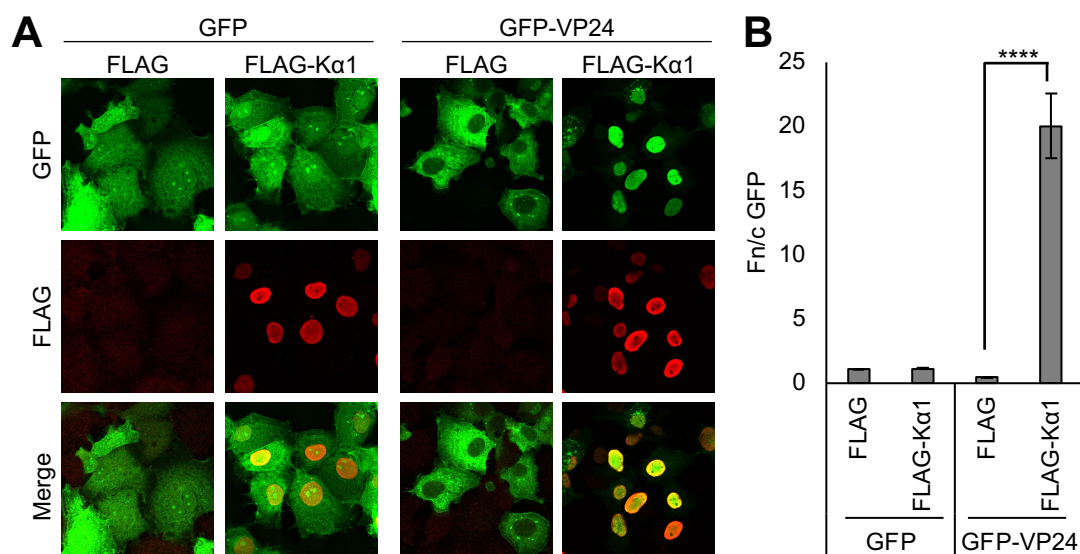

**Figure 2**

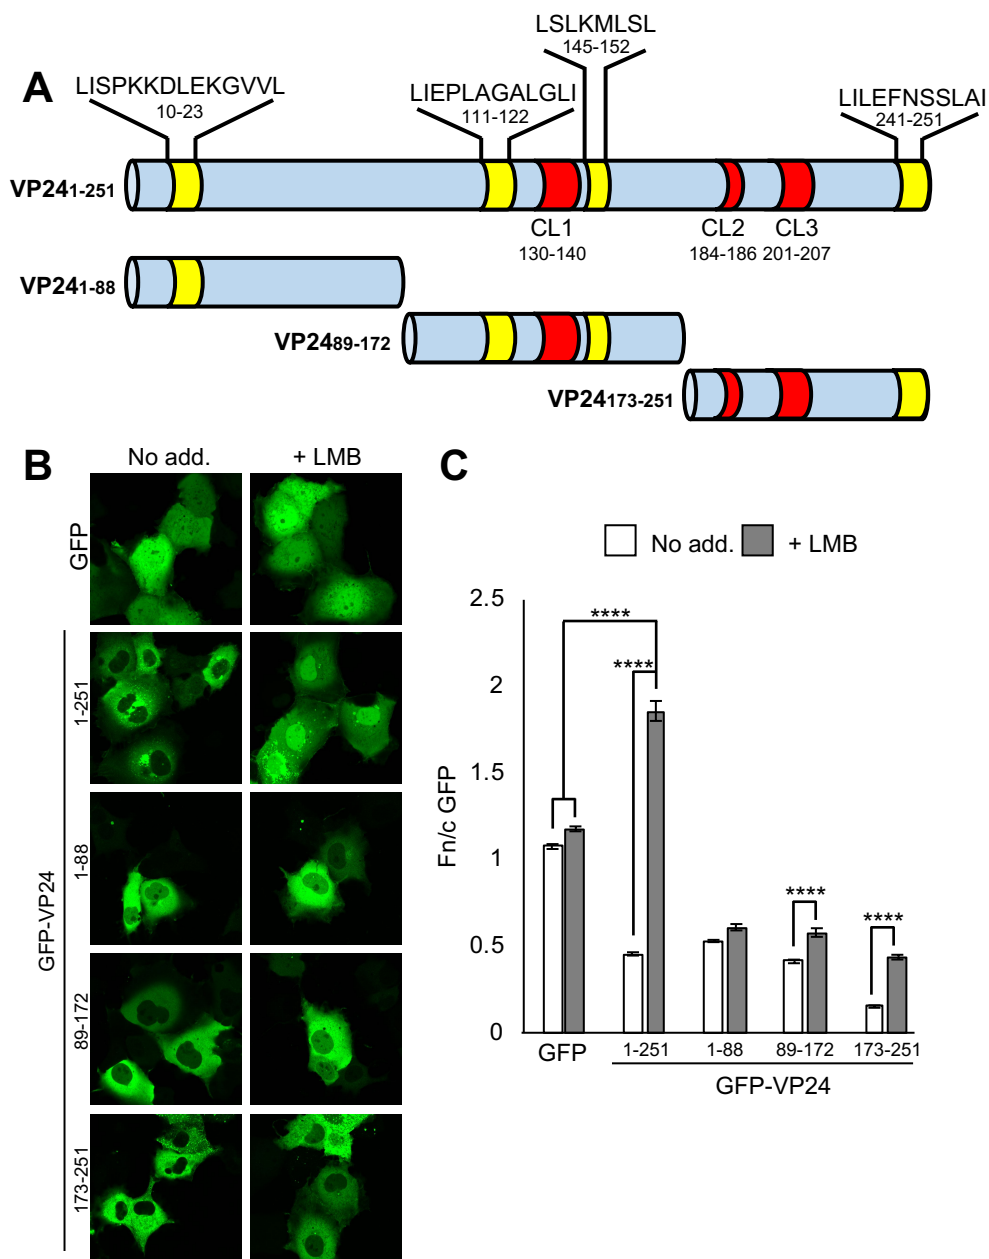

Figure 3

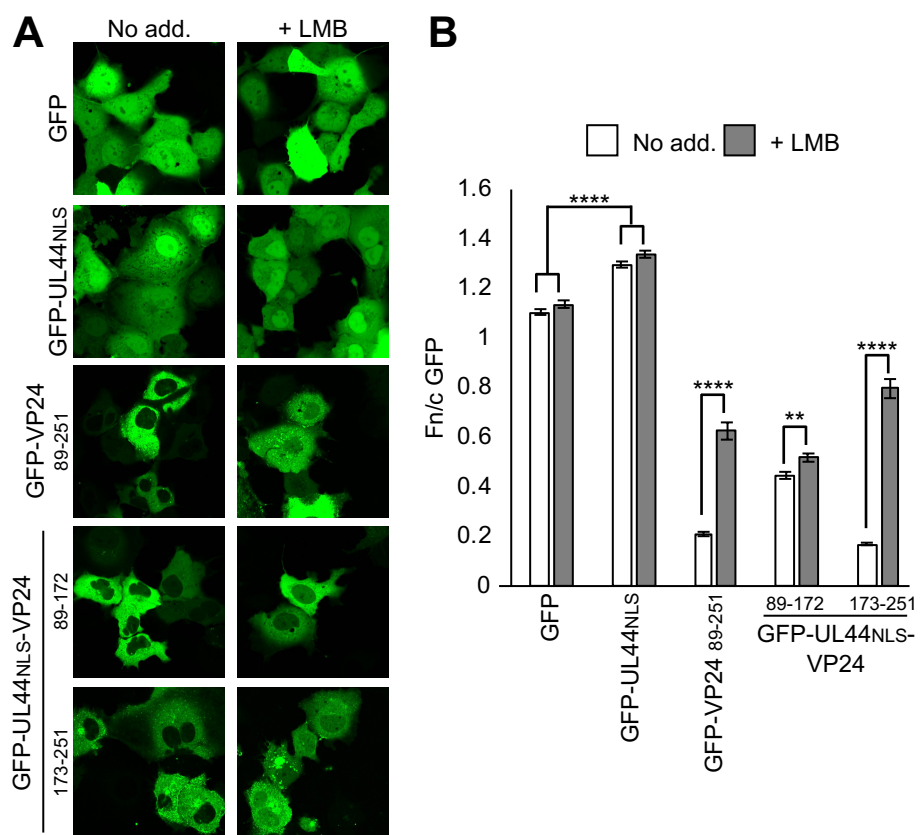



**Figure 4**

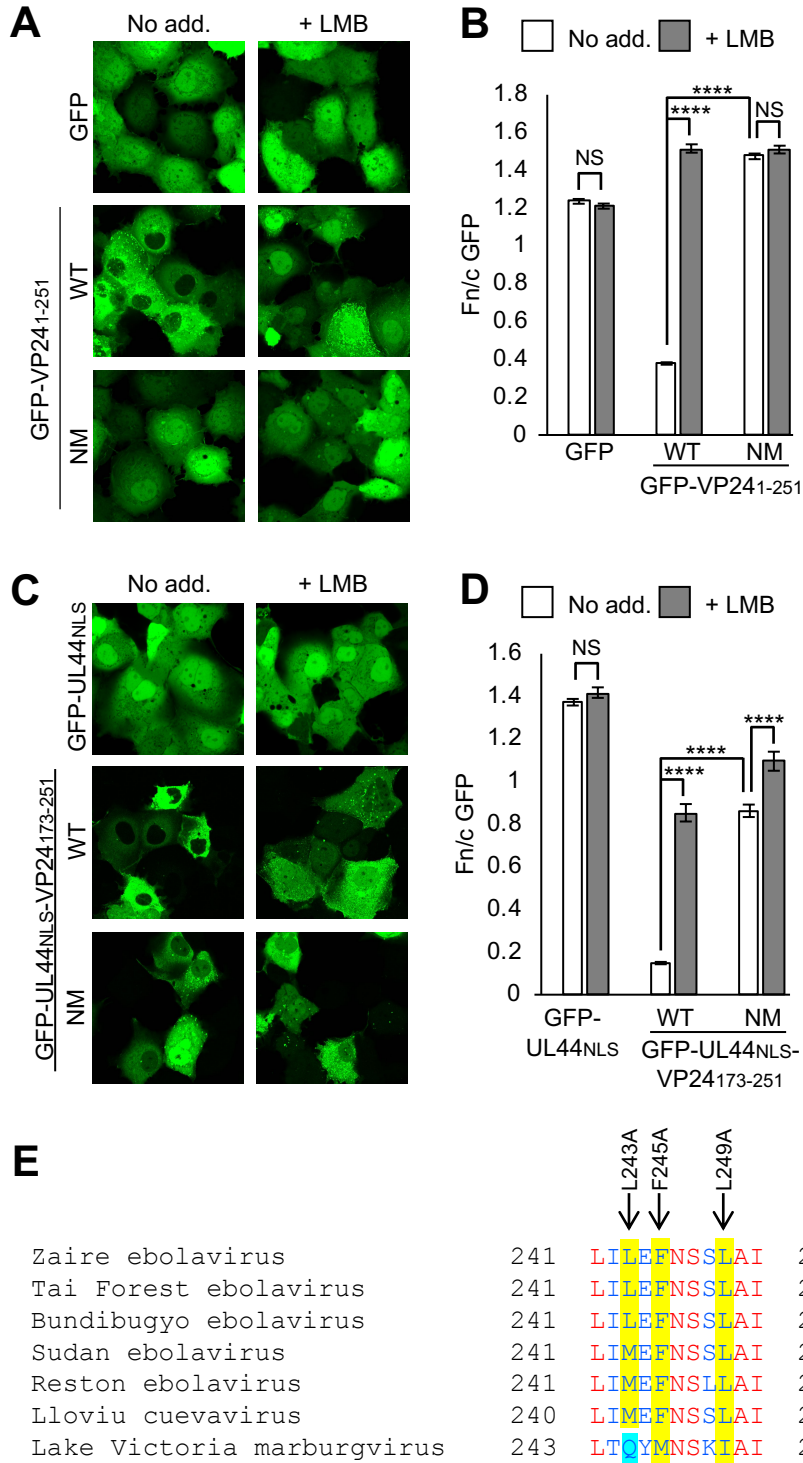

**Figure 5**

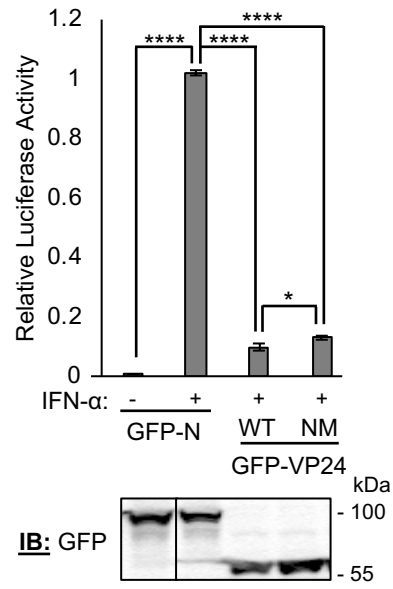

Source: http://biorxiv.org/content/10.1101/2020.08.10.245563v1.full.pdf
